# Supplementary material for: DDX5 Regulates DNA Replication and Is Required for Cell Proliferation in a Subset of Breast Cancer Cells
Source: Oxford University Press journal article supplement (doi:10.1158/2159-8290.cd-12-0116), 2012-06-30
Supplement: 21598290cd120116-sup-t1_xls_71kb.xls [file 21598290cd120116-sup-t1_xls_71kb.xls]

## Sheet: Sheet1
Supplementary Table 1
Proliferation assay, plasmid stability assay, and plasmid stability ratios for each shRNA tested in the screen.
* Note that plasmid stability and proliferation assay results are normalized to Ff-luciferase shRNA transduced cells so a value of 100
in these columns indicates similar colony formation as observed for cells transduced with the Ff-luciferase shRNA.
Screen shRNA results:							Replication gene shRNA results:
Gene	Hairpin	plasmid stability	proliferation	plasmid stability ratio			Gene	Hairpin	plasmid stability	proliferation	plasmid stability ratio
DDX5	V2HS_24065	7.52664	69.4671	0.108348			ORC1	Orc1mi550	44.3695	126.603	0.350463
	V2HS_24063	8.705	60.7223	0.143358			ORC2	Orc2mi1903	41.0449	93.0657	0.441031
NCAP-G2	V2HS_173669	1.17943	19.5191	0.0604244				Orc2mi1981	73.6831	114.334	0.644454
	V2HS_173668	17.0497	81.3912	0.209478			ORC3	V2HS_48972	50.7043	145.851	0.347644
	V2HS_173665	2.08135	32.5318	0.0639788				V2HS_48977	75.1434	132.831	0.565706
	V2HS_277726	4.00659	58.231	0.0688051				V2HS_246135	37.2253	120.431	0.3091
PICH1	V2HS_155113	79.6809	122.113	0.652516			ORC4	V2HS_152488	110.368	167.363	0.659457
	V2HS_155116	20.6574	77.3357	0.267113				V2HS_152489	63.7486	190.603	0.334457
	V2HS_155115	16.2345	67.6291	0.240052				V2HS_235462	79.2448	100.224	0.790675
c14orf130	V2HS_255281	40.5088	99.6014	0.406709			ORC5	V2HS_152494	45.6673	55.7079	0.819763
	V2HS_202843	41.1644	36.8921	1.11581				V2HS_152497	86.2743	71.2628	1.21065
	V2HS_203406	9.86057	13.9561	0.706544			ORC6	V2HS_198092	100.238	124.694	0.803871
	V2HS_203155	29.7216	90.3426	0.328987				V2HS_199450	44.7689	103.354	0.433161
AND1	V2HS_196383	115.202	126.513	0.910601				V2HS_12700	79.5917	103.946	0.765701
	V2HS_199940	5.13399	24.2622	0.211604				V2HS_199171	90.0528	127.777	0.704767
	V2HS_196266	20.7267	52.2007	0.397058			MCM3	V2HS_262054	3.86534	94.0767	0.0410871
	V2HS_198756	43.8644	88.5764	0.495215				V2HS_151632	6.17282	65.993	0.0935376
KDELC1	V2HS_98989	68.9272	98.3977	0.700497				V2HS_151629	2.97771	58.8895	0.0505643
	V2HS_231665	11.4994	55.304	0.207931			MCM5	V2HS_84917	5.13192	53.3231	0.0962421
	V2HS_98994	59.6653	110.723	0.538871				V2HS_84918	1.31397	10.9432	0.120072
	V2HS_98993	47.6802	106.059	0.449563				V2HS_84920	20.7473	82.0458	0.252874
CROP	V2HS_65523	22.2531	88.0827	0.252638			MCM10	V2HS_175970	46.1746	75.1549	0.614393
	V2HS_65519	132.686	110.749	1.19808				V2HS_221770	58.3244	110.087	0.529805
MGC2610	V2HS_246266	77.5733	108.245	0.716644			CDC6	V2HS_112878	39.4088	97.0138	0.406219
	V2HS_49352	72.3021	95.5905	0.756374				V2HS_112875	45.4039	45.4818	0.998287
	V2HS_111372	24.1969	80.7764	0.299553				V2HS_112873	59.8117	181.831	0.328941
	V2HS_111373	100.948	97.9141	1.03099			CDC45	V2HS_172574	22.2578	89.9046	0.247572
	V2HS_111370	57.7648	105.214	0.549022				V2HS_172579	90.4759	137.371	0.658625
	V2HS_111371	91.8397	105.228	0.872767				V2HS_172575	6.00709	18.6437	0.322205
KIAA1529	V2HS_19423	129.447	142.836	0.906258			TYMS	V2HS_94107	10.4252	38.9839	0.267423
	V2HS_19426	71.0735	113.809	0.624496				V2HS_229638	38.5304	47.2377	0.815671
	V2HS_19402	82.1705	165.492	0.496524			SLD5	V2HS_236484	11.9453	64.5893	0.184942
	V2HS_19447	23.4671	79.6945	0.294463				V2HS_138608	1.70928	6.84745	0.249623
	V2HS_19427	51.8913	91.2558	0.568635				V2HS_138603	94.894	157.025	0.604323
	V2HS_19475	102.991	141.358	0.728581			PSF1	V2HS_34187	22.2031	23.8738	0.930022
FIGNL1	V2HS_201768	106.114	103.079	1.02944				V2HS_34186	2.02654	11.4882	0.176403
	V2HS_201915	34.4116	94.0248	0.365984			PCNA	V2HS_152708	1.70928	5.44983	0.313639
	V2HS_201952	138.566	94.8624	1.4607				V2HS_152710	12.9623	30.1411	0.430055
	V2HS_202276	84.0864	93.9367	0.895139				V2HS_152712	15.401	40.5397	0.3799
FLJ25416	V2HS_29802	28.2706	78.4395	0.360413				V2HS_261970	37.4697	92.067	0.406983
	V2HS_29799	52.4757	91.0463	0.576363			FLJ20516	V2HS_222044	46.7205	112.862	0.41396
	V2HS_29797	77.5625	126.488	0.613202			(TIPIN)	V2HS_174169	113.398	144.738	0.783471
	V2HS_29798	124.76	125.255	0.996047				V2HS_220099	6.36452	21.227	0.299832
C9orf76	V2HS_176963	62.7912	100.252	0.626334				V2HS_174170	148.27	147.897	1.00252
	V2HS_176960	88.6402	79.704	1.11212
	V2HS_276972	25.1235	64.7613	0.38794
ABHD10	V2HS_175389	54.1839	89.0116	0.608729
	V2HS_175391	24.6304	56.8658	0.433132
	V2HS_175390	45.0325	75.3441	0.597691
KIAA1614	V2HS_248717	66.231	142.619	0.464391
	V2HS_249384	76.6276	101.269	0.756672
	V2HS_59045	69.4094	164.443	0.422088
FLJ20530	V2HS_174203	115.704	129.642	0.892488
	V2HS_174199	31.2986	37.9753	0.824182
	V2HS_174204	25.4914	39.4172	0.646706
	V2HS_223307	73.8502	149.168	0.495082
ELLS1	V2HS_37210	40.7186	76.7226	0.530724
	V2HS_37208	42.0386	82.3494	0.51049
	V2HS_37211	79.2342	100.574	0.787822
RAMP	V2HS_225424	12.5093	79.2393	0.157867
	V2HS_115868	44.6873	89.5705	0.498906
	V2HS_115869	92.338	118.498	0.779237
CDCA7	V2HS_57684	44.9932	86.2674	0.521556
	V2HS_57686	34.6868	68.1788	0.508763
	V2HS_57682	80.3357	91.4723	0.878252
ZNF183	V2HS_95049	64.1811	76.93	0.83428
	V2HS_95052	25.9102	51.2342	0.505721
	V2HS_95051	55.0374	100.895	0.545489
ACD	V2HS_116352	59.2401	77.605	0.763354
	V2HS_116355	75.1478	100.495	0.747779
	V2HS_116356	62.8622	79.7384	0.788355
CDCA5	V2HS_70809	7.21467	22.6035	0.319183
	V2HS_70812	14.7694	30.1257	0.490257
	V2HS_70776	87.7883	121.565	0.722149
COMMD7	V2HS_259262	78.016	90.7285	0.859883
	V2HS_88587	74.0982	99.7637	0.742737
	V2HS_259596	35.9255	70.2953	0.511065
kiaa0008	V2HS_95173	77.7209	111.983	0.69404
	V2HS_95176	46.1538	99.4292	0.464188
	V2HS_232596	77.9637	98.1332	0.794469
DDX11	V2HS_242050	97.7712	116.427	0.839766
	V2HS_24008	77.0271	112.839	0.682631
	V2HS_24005	78.3974	95.8674	0.817769
C8ORF1	V2HS_15117	66.632	144.166	0.462189
	V2HS_15118	24.6151	20.6874	1.18986
FLJ10154	V2HS_135542	102.337	101.404	1.00919
	V2HS_135540	63.4685	109.14	0.581535
	V2HS_237686	65.9785	79.7006	0.82783
MGC40214	V2HS_21213	38.3845	51.3128	0.748049
	V2HS_21211	53.7261	65.9124	0.815114
	V2HS_21212	63.0709	50.8553	1.2402
C1orf63	V2HS_39946	31.9769	63.9748	0.499836
	V2HS_39943	65.0465	102.104	0.637063
	V2HS_39941	85.6681	103.319	0.829159
	V2HS_39942	139.875	123.167	1.13566
dkfzp434b168	V2HS_96517	23.8734	24.5232	0.973503
	V2HS_96521	12.0984	30.3287	0.39891
	V2HS_96520	14.616	27.8406	0.524989
dkfzp313a243	V2HS_225310	108.772	116.296	0.935307
	V2HS_122245	97.2945	98.2001	0.990778
	V2HS_122242	64.3123	79.225	0.811767
	V2HS_111232	63.6566	99.9088	0.637147
	V2HS_111234	77.8268	83.6863	0.929982
	V2HS_111235	125.276	96.7845	1.29439
	V2HS_111231	40.7098	85.3165	0.477163
FBXO30	V2HS_202575	61.8717	105.798	0.584807
	V2HS_262021	64.0006	99.0327	0.646257
	V2HS_262218	62.9213	106.572	0.590412
	V2HS_202507	114.267	118.812	0.961748
	V2HS_203571	90.4347	78.5485	1.15132
	V2HS_202750	111.369	108.612	1.02539
TTC14	V2HS_85344	64.8876	84.9997	0.763386
	V2HS_85339	121.274	115.454	1.05041
	V2HS_85343	93.2584	120.868	0.77157
CANP	V2HS_285579	126.478	121.03	1.04502
	V2HS_285907	45.683	62.2801	0.73351
	V2HS_285266	93.3471	103.699	0.900173
ATAD2	V2HS_54361	100.458	110.864	0.906138
	V2HS_54362	108.131	115.641	0.935059
	V2HS_54364	129.864	115.208	1.12722
NUP43	V2HS_157038	48.2259	59.8662	0.805562
	V2HS_157037	85.068	89.2581	0.953057
	V2HS_157040	37.3743	74.8001	0.499656
NT5C2L1	V2HS_38658	70.2543	105.756	0.664306
	V2HS_38659	57.6878	95.7774	0.602311
	V2HS_38656	83.1904	108.042	0.769979
	V2HS_38657	115.095	106.988	1.07577
	V2HS_159132	103.888	126.716	0.819849
	V2HS_159134	184.565	135.326	1.36385
LMO4	V2HS_256362	96.8658	88.9861	1.08855
	V2HS_84510	97.7972	118.242	0.827093
	V2HS_84513	99.4973	109.615	0.907699
DDX17	V2HS_238845	94.4116	95.1144	0.992611
	V2HS_203274	65.6121	95.9388	0.683895
	V2HS_203066	72.1762	96.5083	0.747876
C6orf72	V2HS_205077	59.4398	46.2145	1.28617
	V2HS_250508	71.2514	81.4441	0.874851
	V2HS_205290	89.5846	118.181	0.758027
DC13	V2HS_50978	44.1419	81.303	0.54293
	V2HS_50979	100.477	90.7011	1.10778
	V2HS_50982	157.905	108.713	1.4525
PARP16	V2HS_174138	62.2496	76.5511	0.813177
	V2HS_174136	88.145	86.3283	1.02104
	V2HS_174137	86.3932	106.844	0.808595
Other shRNA's tested using plasmid stability assay but not proliferation assay:
Gene	Hairpin	plasmid stability
MYCBP1	200448	120.4
	254277	140.392
	251405	113.981
RhoBTB3	95941	73.7307
	95943	66.2276
	95944	91.4381
USP53	19254	64.8604
	19252	98.2743
	19251	107.561
KIAA0101	73015	55.3231
	73018	100.192
FBXL20	195454	101.595
	262023	127.015
KIAA0701	50916	142.438
	50917	139.917
	50914	92.1407
FLJ12973	176783	78.8761
	176782	67.1309
	176779	133.08
KIAA0738	260627	157.125
	73695	72.5332
KIAA1598	175062	51.7722
	223530	65.7685
	222689	84.7197
XM_066946	23889	73.0741
	23885	57.3418
	23890	125.817
FLJ35740	206342	122.803
	47350	92.4231
FLJ13231	82234	105.961
	82235	118.523
	82233	71.2899
	256796	29.9518
FLJ11127	220725	108.59
	176291	188.819
	277435	118.559
KIAA1526	102262	46.4678
	102265	98.8005
